# Supplementary material
Source: PubMed Central journal article supplement (PMC3256258)
Supplement: NIHMS324678-supplement-supplement_1.pdf [file NIHMS324678-supplement-supplement_1.pdf]

**Figure 4.** Impact of forced overexpression of ND5 gene on in vitro proliferation, invasion and superoxide production of lung cancer cells SW-900. A. The presence of the exogenous fusion protein in the mitochondria of the ND5 transfected cells was detected using anti-myc antibody by immunofluorescence (arrow). B. Number of proliferating cells was significantly higher ( $P=0.0031$ , indicated by asterisk) in the ND5 mutant (ND5-mt) transfected cells compared to the wild type (ND5-wt) transfected cells (Left panel). Representative photomicrograph from each experimental group is shown in the right panel. Magnification X 200. C. Number of invasive cells was also significantly higher ( $P=0.0002$ , indicated by asterisk) in the ND5 mutant (ND5-mt) transfected cells compared to the wild type (ND5-wt) transfected cells (Left panel). Representative photomicrograph from each experimental group is shown in the right panel. Magnification X 400 C. D. Number of superoxide producing cells was determined by the MitoSox superoxide assay. Number of positive cells was significantly higher ( $P=0.0049$ , indicated by arrow) in the ND5 mutant (ND5-mt) transfected group compared to the wild type (ND5-wt) transfected group (Left panel). Representative photomicrograph from each experimental group is shown in the right panel. Magnification X 200.

#### **Supplementary Data**

**Supplementary Figure 1.** Age distribution of mtDNA mutation among the never-smoker and current-smoker lung cancer patients. No significant association was observed ( $P=0.631$ ) between the age groups and mtDNA mutation among the never-smoker or current-smoker lung cancer patients.

**Supplementary Figure 2.** Distribution of mtDNA mutation in gender groups among the never-smoker and current-smoker lung cancer patients. No significant association was observed ( $P=0.253$ ) between the gender groups and mtDNA mutation among the never-smoker or current-smoker lung cancer patients.

**Supplementary Figure 3.** Age distribution of mtDNA content among the never-smoker and current-smoker lung cancer patients. No significant association was observed ( $P=0.353$ ) between the age groups and mtDNA content among the never-smoker or current-smoker lung cancer patients.

**Supplementary Figure 4.** Distribution of mtDNA content in gender groups among the never-smoker and current-smoker lung cancer patients. No significant association was observed ( $P=0.623$ ) between the gender groups and mtDNA content among the never-smoker or current-smoker lung cancer patients.

**Supplementary Figure 5.** Distribution of mtDNA content index in ethnic groups among the never-smoker and current-smoker lung cancer patients. No significant association was observed ( $P=0.336$ ) between the two ethnic groups (Asia vs. Caucasian) and mtDNA content among the never-smoker or current-smoker lung cancer patients.

**Supplementary Table 1.** Pattern of somatic mtDNA mutations at different regions of the mitochondrial genome among the lung cancer patients.

**Supplementary Table 2.** *EGFR* mutations (exon 19 and 21) in the lung cancer patients.

**Supplementary Table 3.** *KRAS* mutations (exon 2) in the lung cancer patients
